# Supplementary material for: Cool green-emissive Y2Si2O7:Tb3+ nanophosphor: auto-combustion synthesis and structural and photoluminescence characteristics with good thermal stability for lighting applications
Source: PubMed Central journal article supplement — RSC Adv. 2024 May 22;14(23):16560–73. doi: 10.1039/d4ra02571g (PMC11109845; doi:10.1039/d4ra02571g), 2024-05-22
Supplement: RA-014-D4RA02571G-s001.pdf [file RA-014-D4RA02571G-s001.pdf]

## Cool green emissive $\text{Y}_2\text{Si}_2\text{O}_7:\text{Tb}^{3+}$ nanophosphor: Auto combustion synthesis, structural and photoluminescence characteristics with good thermal stability for lighting applications

Pawan Kumar<sup>a</sup>, Devender Singh<sup>a\*</sup>, Sonika Kadyan<sup>a</sup>, Harish Kumar<sup>b</sup> and Ramesh Kumar<sup>c</sup>

<sup>a</sup>Department of Chemistry, Maharshi Dayanand University, Rohtak-124001, India.

<sup>b</sup>Department of Chemistry, School of Chemical Sciences, Central University of Haryana, Mahendergarh-123031, India.

<sup>c</sup>Department of Chemistry, Kurukshetra University Kurukshetra-136119, Haryana, India.

### Electronic Supporting Information

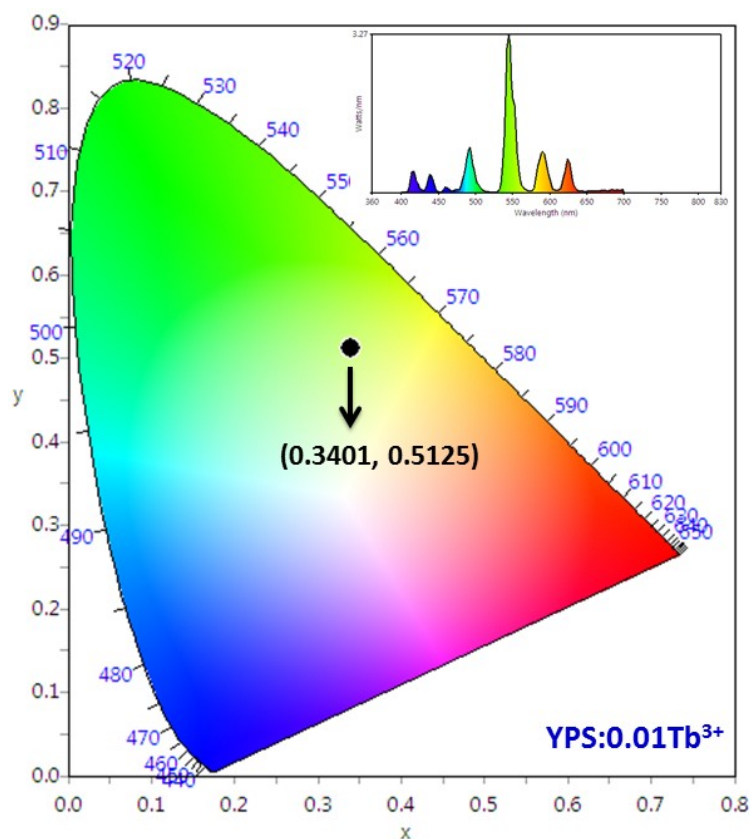

Fig. S1 CIE 1931 profile of YPS:0.01Tb<sup>3+</sup> nanophosphor.

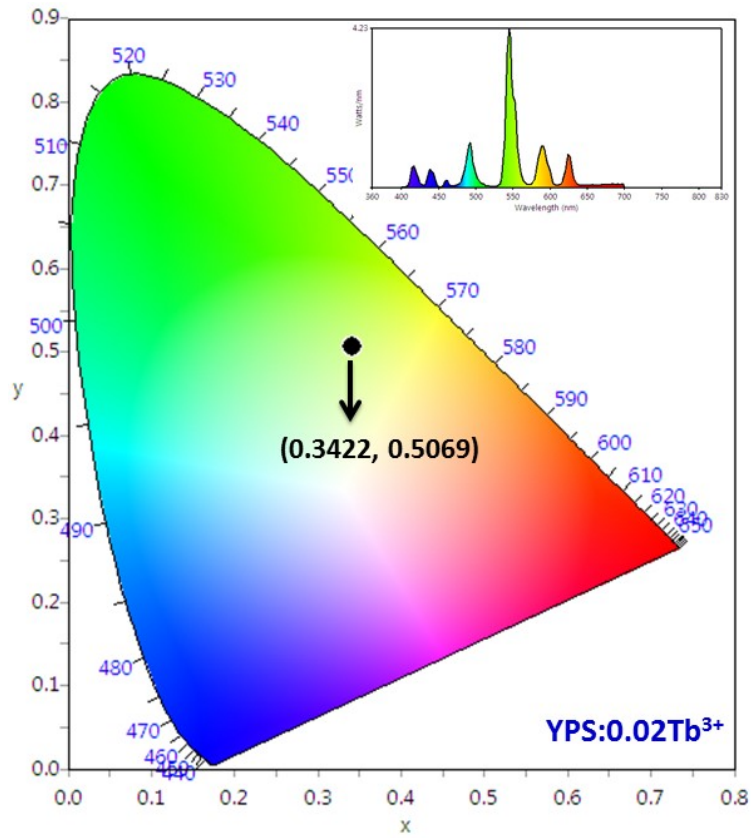

Fig. S2 CIE 1931 profile of YPS:0.02Tb<sup>3+</sup> nanophosphor.

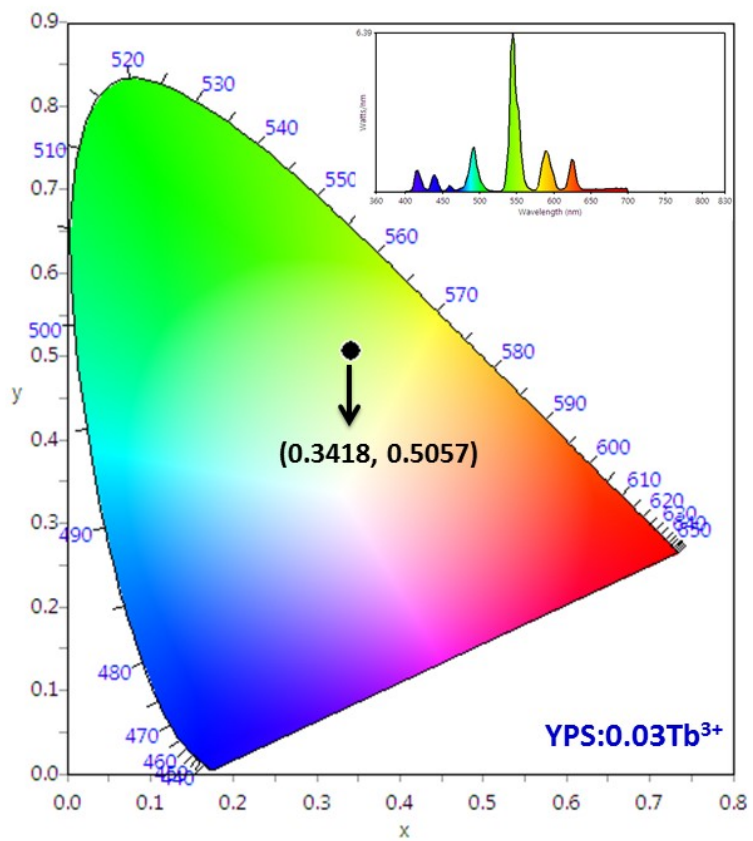

Fig. S3 CIE 1931 profile of YPS:0.03Tb<sup>3+</sup> nanophosphor.

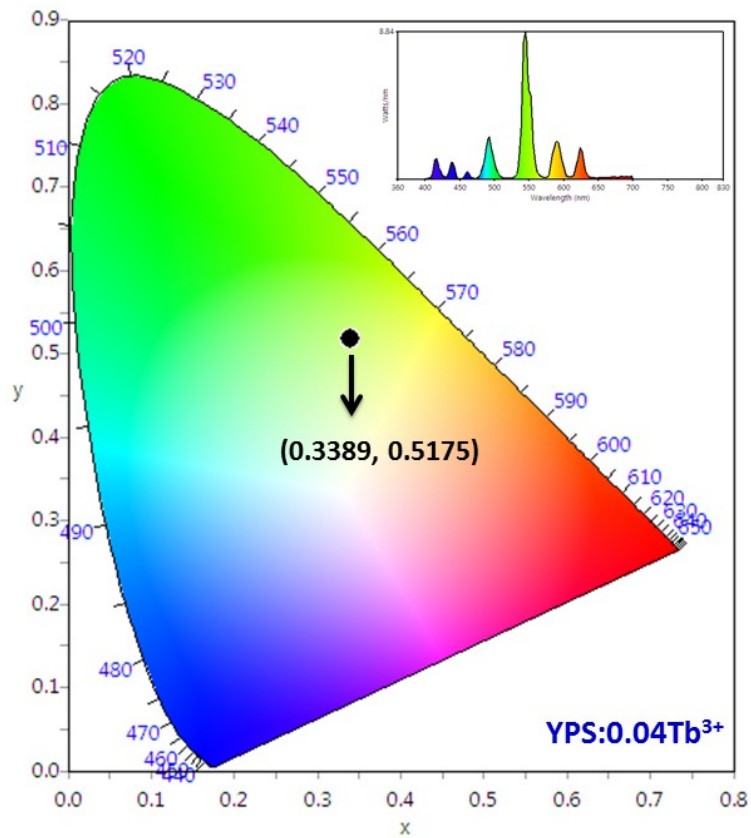

**Fig. S4** CIE 1931 profile of YPS:0.04Tb<sup>3+</sup> nanophosphor.

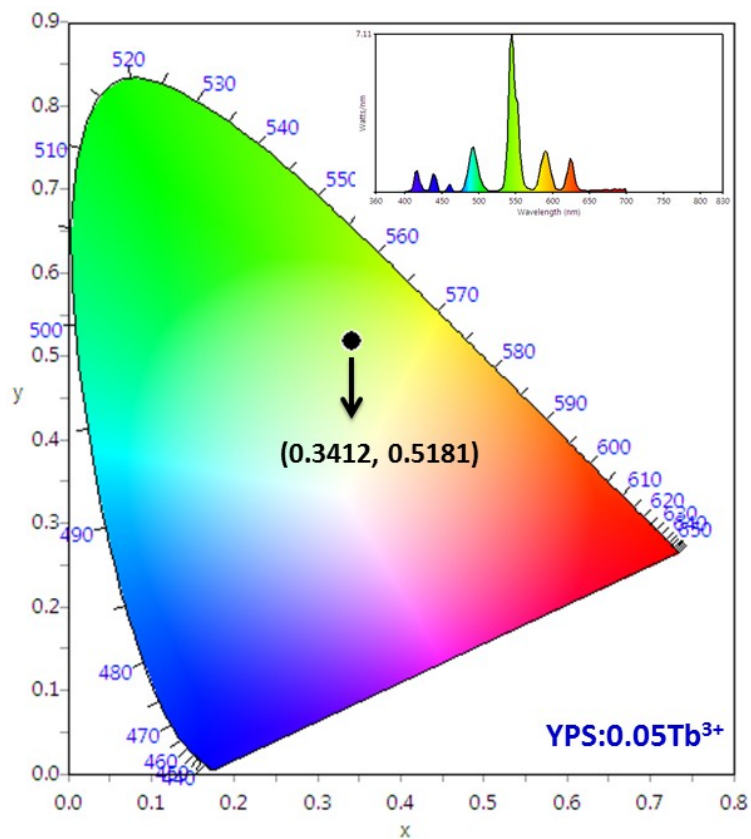

**Fig. S5** CIE 1931 profile of YPS:0.05Tb<sup>3+</sup> nanophosphor.

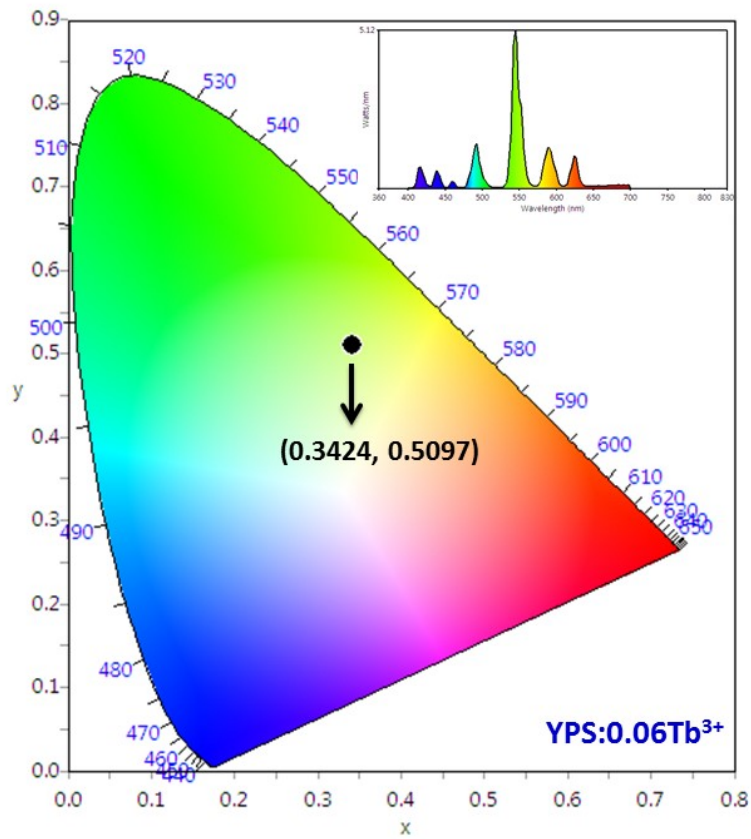

Fig. S6 CIE 1931 profile of YPS:0.06Tb<sup>3+</sup> nanophosphor.

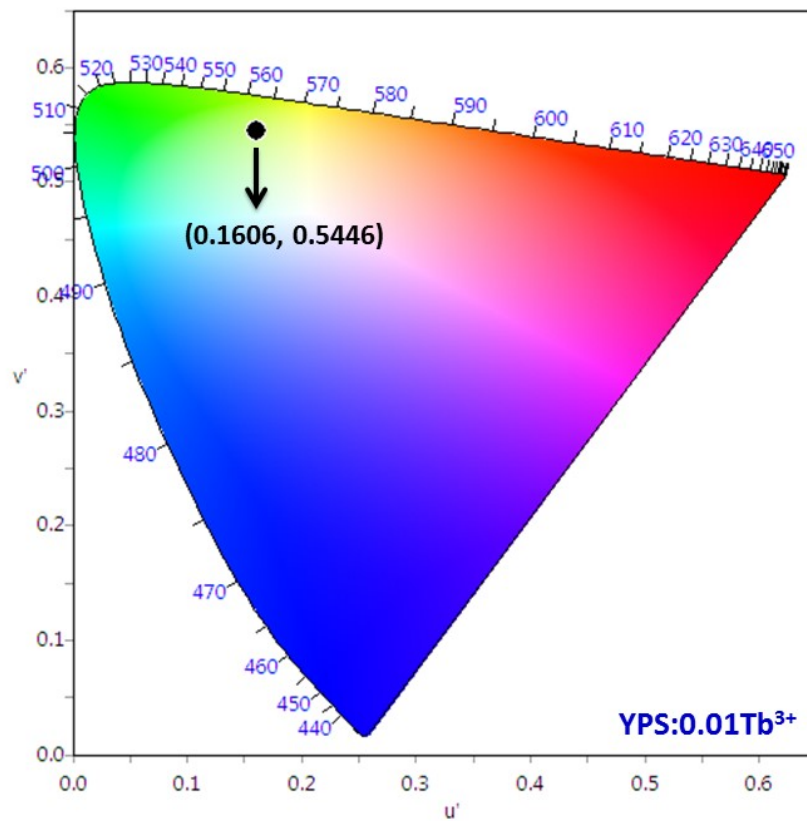

Fig. S7 CIE 1976 profile of YPS:0.04Tb<sup>3+</sup> nanophosphor.

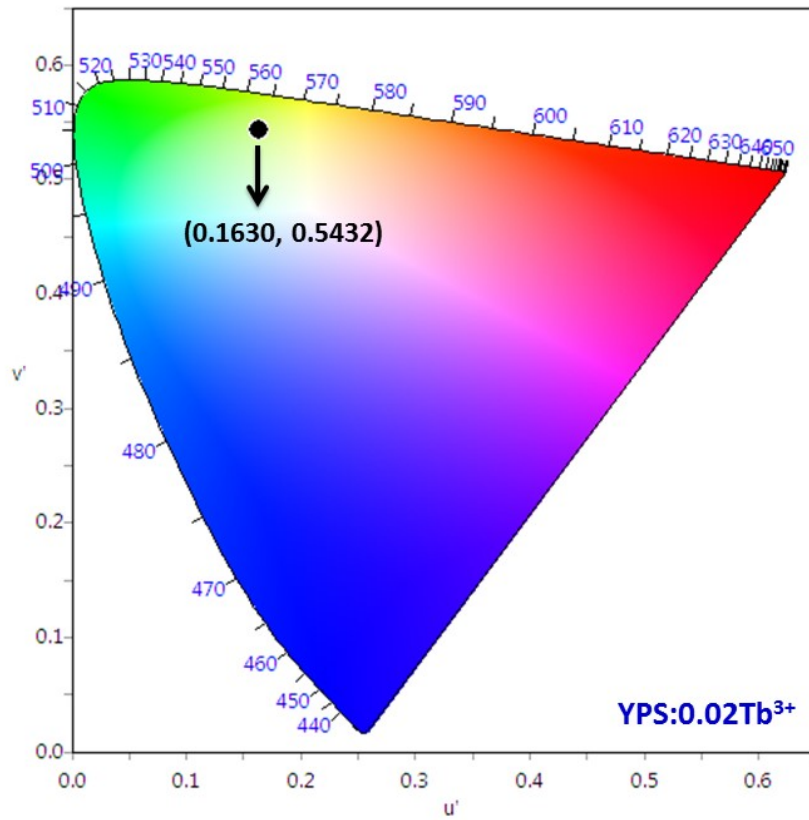

Fig. S8 CIE 1976 profile of YPS:0.02Tb<sup>3+</sup> nanophosphor.

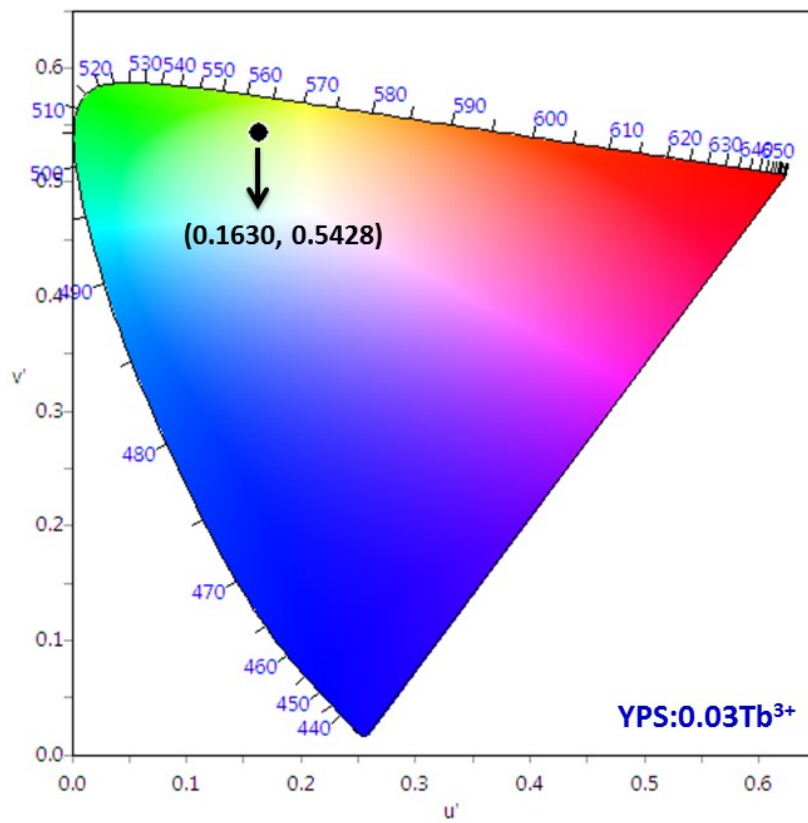

Fig. S9 CIE 1976 profile of YPS:0.03Tb<sup>3+</sup> nanophosphor.

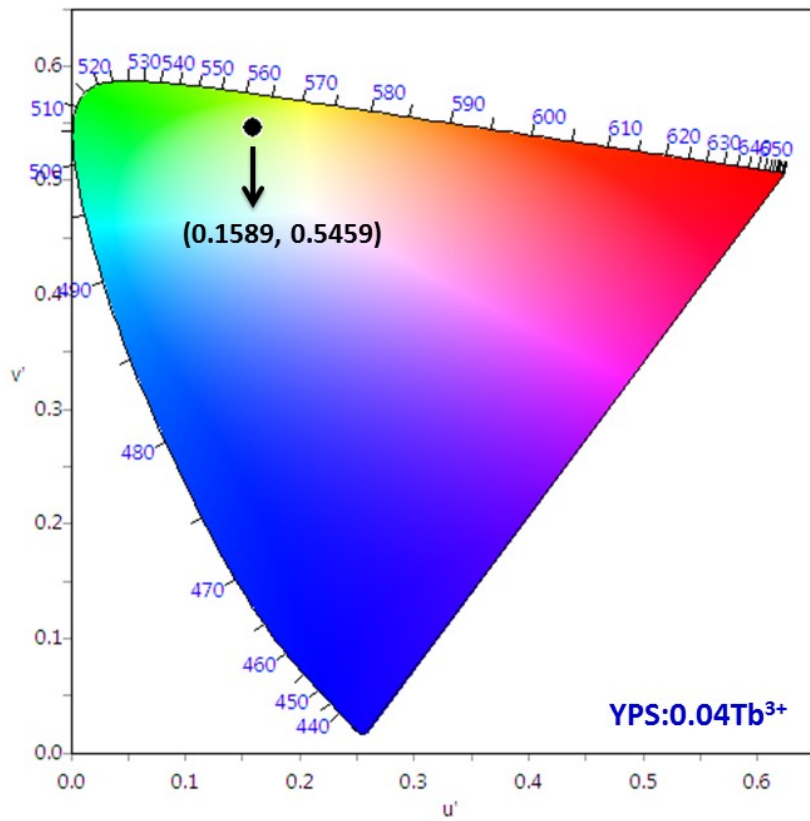

**Fig. S10** CIE 1976 profile of YPS:0.04Tb<sup>3+</sup> nanophosphor.

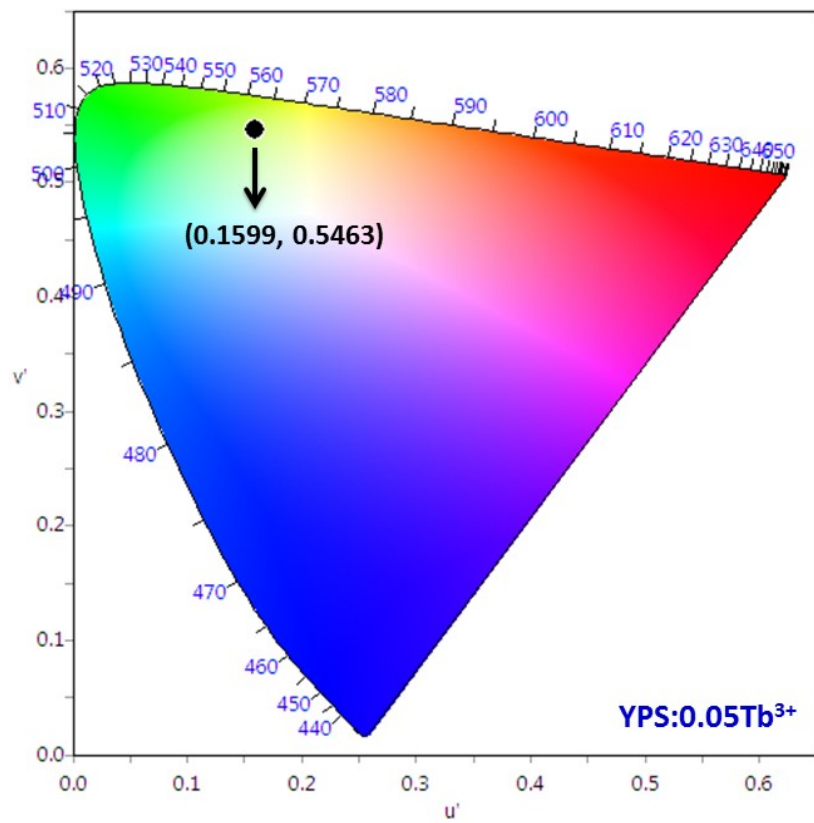

**Fig. S11** CIE 1976 profile of YPS:0.05Tb<sup>3+</sup> nanophosphor.

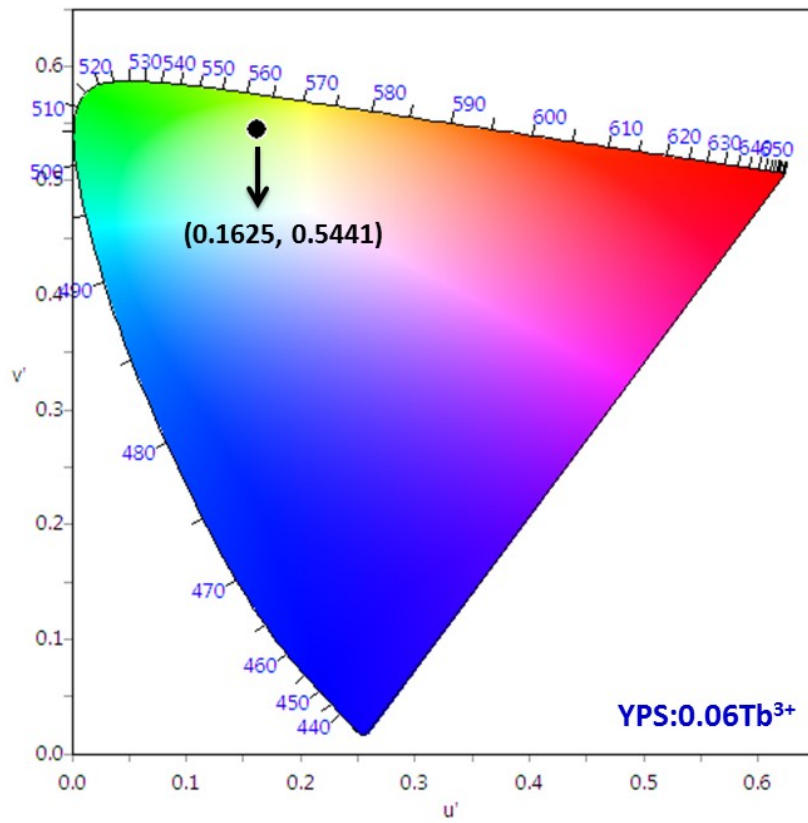

**Fig. S12** CIE 1976 profile of YPS:0.06Tb<sup>3+</sup> nanophosphor.
